# Supplementary material for: Linkage Mapping and Genome-Wide Association Studies of the Rf Gene Cluster in Sunflower (Helianthus annuus L.) and Their Distribution in World Sunflower Collections
Source: Front Genet. 2019 Mar 14;10:216. doi: 10.3389/fgene.2019.00216 (PMC6426773; doi:10.3389/fgene.2019.00216)
Supplement: Table S1 — List of sunflower inbred/germplasm lines used for single nucleotide polymorphism marker validation associated with male fertility restoration Rf1 gene. The detailed information of each line can be found in the USDA National Plant Germplasm Systerm: https://www.ars-grin.gov/npgs/. [file Table_1.XLSX]

## Sheet: Sheet1
Table S1 List of sunflower inbred/germplasm lines used for single nucleotide polymorphism marker validation associated with male fertility restoration Rf1 gene
The detailed information of each line can be found in the USDA National Plant Germplasm Systerm: https://www.ars-grin.gov/npgs/
a) USDA-ARS released sunflower lines
Line	Line	Line	Line	Line	Line	Line
HA 60	HA 338	HA 432	RHA 270	RHA 355	RHA 436	NEG-1255
HA 61	HA 339	HA 433	RHA 271	RHA 356	RHA 437	NMS 377
HA 64	HA 341	HA 434	RHA 272	RHA 357	RHA 438	NSL 15346
HA 89	HA 342	HA 435	RHA 273	RHA 358	RHA 439	NSL 74336
HA 99	HA 343	HA 441	RHA 274	RHA 359	RHA 440	P-21-VR1
HA 113	HA 349	HA 442	RHA 274 (LP-1)	RHA 360	RHA 443	PAR-1671-1
HA 124	HA 350	HA 444	RHA 274 (LP-2)	RHA 361	RHA 447	PAR-1673-2
HA 224	HA 351	HA 445	RHA 274 (LS-1)	RHA 362	RHA 450	PET-PET-1741-2
HA 232	HA 352	HA 446	RHA 274 (LS-2)	RHA 363	RHA 453	PRA-HIR-437
HA 234	HA 353	HA 448	RHA 275	RHA 364	RHA 454	PRA-PRA-1142
HA 277	HA 369	HA 449	RHA 276	RHA 365	RHA 455	PRA-RUN-417-3
HA 285	HA 370	HA 451	RHA 278	RHA 366	RHA 461	R-185
HA 286	HA 371	HA 452	RHA 279	RHA 367	RHA 462	R-188
HA 287	HA 372	HA 456	RHA 280	RHA 368	RHA 463	R-190
HA 288	HA 378	HA 457	RHA 282	RHA 373	RHA 464	R-201
HA 289	HA 379	HA 458	RHA 293	RHA 374	RHA 468	R-202
HA 290	HA 380	HA 459	RHA 294	RHA 375	RHA 801	R-206
HA 291	HA 382	HA 460	RHA 295	RHA 376	RHA 854	R-207
HA 292	HA 383	HA 465	RHA 296	RHA 377	RHA 855	RES-834-2
HA 300	HA 384	HA 466	RHA 297	RHA 381	RHA 856	RES-834-3
HA 301	HA 385	HA 467	RHA 298	RHA 386	RHA 857	Rf ANN-1742
HA 302	HA 390	HA 821	RHA 299	RHA 387	RHA 858	Rf ARG-420
HA 303	HA 393	HA 822	RHA 309	RHA 388	RHA 859	Rf Tub-346
HA 304	HA 394	HA 850	RHA 310	RHA 389	09-1202-4	RGIG1
HA 305	HA 402	HA 851	RHA 311	RHA 391	09-1205-1	RMAX1
HA 306	HA 403	HA 852	RHA 324	RHA 392	09-383-1	RPEF1
HA 307	HA 404	HA 853	RHA 325	RHA 395	09-387-1	RPET2
HA 308	HA 405	HA 382 (LS-1)	RHA 326	RHA 396	09-388-1	SD00-1269
HA 312	HA 406	HA 382 (LS-2)	RHA 327	RHA 397	09-7-2	SD00-1329
HA 313	HA 407	HA 412 HO	RHA 328	RHA 398	ANO-1509-1	SD00-1349
HA 314	HA 410	HA 821 (LP-1)	RHA 329	RHA 399	ARG-1575-2	SDB1
HA 315	HA 411	HA 821 (LS-1)	RHA 330	RHA 400	ARG-420	SDB2
HA 316	HA 412	HA-R1	RHA 331	RHA 408	DEB-SIL-367-2	SDB3
HA 317	HA 413	HA-R2	RHA 332	RHA 409	DES-1474-1	SDR24
HA 318	HA 414	HA-R3	RHA 333	RHA 415	GIG-1616-1	SDR25
HA 319	HA 421	HA-R4	RHA 334	RHA 416	GIG-1616-2	SDR27
HA 320	HA 422	HA-R5	RHA 340	RHA 417	HIR-1734-1	SDR28
HA 321	HA 423	HA-R6	RHA 344	RHA 418	HIR-1734-2	SDR29
HA 322	HA 424	HA-R7	RHA 345	RHA 419	HIR-828-3	SDR30
HA 323	HA 425	HA-R8	RHA 346	RHA 420	IMISUN-1	STR-1622-2
HA 335	HA 429	RHA 265	RHA 347	RHA 426	IMISUN-2	SURES-1
HA 336	HA 430	RHA 266	RHA 348	RHA 427	IMISUN-3	SURES-2
HA 337	HA 431	RHA 269	RHA 354	RHA 428	IMISUN-4	TUB-1709-3
b) USDA-ARS collected sunflower plant introduction (PI)
Line	Country of origin	State/Province	Line	Country of origin	State/Province
PI 204578	Turkey		PI 600723	United States	North Dakota
PI 386236	Former Soviet Union		PI 600724	United States	North Dakota
PI 431520	Romania		PI 600725	United States	North Dakota
PI 432508	United States	Arizona	PI 600807	United States
PI 432519	United States	New Mexico	PI 600808	United States
PI 468635	Mexico		PI 600809	United States
PI 468636	Mexico		PI 600812	United States
PI 476759	Bulgaria		PI 600987	United States	Connecticut
PI 480471	Zambia		PI 650348	China
PI 486364	Former Soviet Union		PI 650349	Uncertain
PI 496264	China	Liaoning	PI 650378	Germany
PI 496266	China	Liaoning	PI 650385	Russian Federation
PI 497936	Russian Federation		PI 650386	Former Soviet Union
PI 497940	Russian Federation		PI 650389	Bulgaria
PI 500687	Zambia		PI 650416	Zimbabwe
PI 505653	Zambia		PI 650418	Zimbabwe
PI 505837	Former Soviet Union		PI 650490	Romania
PI 507894	Hungary		PI 650498	Romania
PI 507900	Hungary		PI 650501	Romania
PI 507903	Hungary		PI 650504	Romania
PI 507904	Hungary		PI 650507	Former Soviet Union
PI 507906	Hungary		PI 650513	Canada
PI 507907	Hungary		PI 650515	Canada
PI 507911	Hungary		PI 650523	Canada
PI 507912	Hungary		PI 650524	Canada
PI 507913	Hungary		PI 650525	Canada
PI 507915	Hungary		PI 650526	Canada
PI 507917	Hungary		PI 650527	Canada
PI 507919	Hungary		PI 650541	Argentina
PI 507920	Hungary		PI 650542	Romania
PI 507922	Hungary		PI 650543	Romania
PI 507924	Hungary		PI 650562	United States	North Dakota
PI 507925	Hungary		PI 650613	United States	North Dakota
PI 511760	Peru		PI 650616	Uncertain
PI 526252	Zimbabwe		PI 650618	Uncertain
PI 526253	Zimbabwe		PI 650625	Former Serbia and Montenegro
PI 526254	Zimbabwe		PI 650645	Mexico
PI 526256	Zimbabwe		PI 650646	Mexico	Mexico
PI 526257	Zimbabwe		PI 650647	United States	New Mexico
PI 526258	Zimbabwe		PI 650648	United States	New Mexico
PI 526259	Zimbabwe		PI 650653	United States	Washington
PI 526260	Zimbabwe		PI 650671	Spain	Cordoba
PI 526261	Zimbabwe		PI 650675	Spain	Cordoba
PI 526262	Zimbabwe		PI 650676	Spain	Cordoba
PI 526263	Zimbabwe		PI 650681	Spain	Cordoba
PI 526264	Zimbabwe		PI 650686	Spain	Cordoba
PI 526265	Zimbabwe		PI 650687	Spain	Cordoba
PI 526267	Zimbabwe		PI 650690	Spain	Cordoba
PI 531338	Hungary		PI 650692	Spain	Cordoba
PI 531340	Hungary		PI 650698	Spain	Cordoba
PI 531341	Poland		PI 650699	Spain	Cordoba
PI 531342	Hungary		PI 650703	Spain
PI 531343	Hungary		PI 650704	Spain	Cordoba
PI 531346	Czechoslovakia		PI 650705	Spain	Cordoba
PI 531348	Hungary		PI 650706	Spain	Cordoba
PI 531352	India		PI 650710	Spain	Cordoba
PI 531353	Hungary		PI 650711	Spain	Cordoba
PI 531355	Zambia		PI 650713	Spain	Cordoba
PI 531356	India		PI 650716	Spain	Jaen
PI 531357	Hungary		PI 650723	United States	California
PI 531359	Germany		PI 650724	United States	California
PI 531360	Hungary		PI 650729	Russian Federation
PI 531361	Hungary		PI 650736	Russian Federation
PI 531362	United States		PI 650756	Mexico
PI 531364	Hungary		PI 650757	Mexico
PI 531365	Hungary		PI 650758	Mexico
PI 531366	Poland		PI 650759	Mexico
PI 531367	France		PI 650760	Mexico
PI 531369	Hungary		PI 650767	Russian Federation
PI 531370	Hungary		PI 650769	Russian Federation
PI 531374	Former Serbia and Montenegro		PI 650771	Former Soviet Union
PI 531376	Germany		PI 650772	Russian Federation
PI 531377	Hungary		PI 650773	Russian Federation
PI 531378	Hungary		PI 650775	Russian Federation
PI 531381	Italy		PI 650776	Russian Federation
PI 531382	Hungary		PI 650777	Russian Federation
PI 531383	Hungary		PI 650778	Russian Federation
PI 531384	Hungary		PI 650779	Russian Federation
PI 531385	Portugal		PI 650780	Bulgaria
PI 531386	Romania		PI 650782	Russian Federation
PI 531387	Hungary		PI 650783	Russian Federation
PI 531388	Morocco		PI 650786	Russian Federation
PI 531389	Czechoslovakia		PI 650787	Russian Federation
PI 531391	Former Soviet Union		PI 650789	China	Jilin
PI 531392	United States		PI 650794	Argentina
PI 531502	United States	Idaho	PI 650796	Argentina
PI 531503	United States	Idaho	PI 650797	Russian Federation
PI 535888	Poland		PI 650798	Argentina
PI 535889	Poland		PI 650800	Argentina
PI 535890	Poland		PI 650801	Iran
PI 535891	Poland		PI 650803	Chile
PI 535892	Poland		PI 650804	Sweden
PI 535893	Poland		PI 650807	France
PI 535894	Poland		PI 650808	Monaco
PI 536623	Spain		PI 650809	Argentina
PI 536624	Spain		PI 650810	Paraguay
PI 536625	Spain		PI 650811	Argentina
PI 536626	Spain		PI 650812	Argentina
PI 536627	Spain		PI 650813	France
PI 536628	Spain		PI 650814	Russian Federation
PI 536629	Spain		PI 650816	Argentina
PI 543006	United States	Idaho	PI 650817	Argentina
PI 552950	Canada	Manitoba	PI 650818	Argentina
PI 552951	Canada	Manitoba	PI 650819	Russian Federation
PI 596742	United States	North Dakota	PI 650820	Argentina
PI 596744	United States	North Dakota	PI 650821	Russian Federation
PI 600684	Spain	Cordoba	PI 650822	Argentina
PI 600690	Spain	Cordoba	PI 650824	Argentina
PI 600692	Spain	Cordoba	PI 650825	Argentina
PI 600695	Spain	Cordoba	PI 650826	Argentina
PI 600696	Spain	Cordoba	PI 650827	Russian Federation
PI 600697	Spain	Cordoba	PI 650828	Russian Federation
PI 600698	Spain	Cordoba	PI 650829	Argentina
PI 600704	Spain	Cordoba	PI 650830	Argentina
PI 600709	Spain	Cordoba	PI 650831	Russian Federation
PI 600710	Spain	Cordoba	PI 650832	Colombia
PI 600711	Spain	Cordoba	PI 650833	Cuba
PI 600712	Spain	Cordoba	PI 650834	Argentina
PI 600714	Spain	Cordoba	PI 650835	Argentina
PI 600716	Spain	Cordoba	PI 650836	Argentina
PI 600718	United States		PI 650837	Argentina
PI 600719	United States		PI 650838	France
PI 600720	United States		PI 650839	Netherlands
PI 600722	United States	Arizona
