# Supplementary material for: Linkage Mapping and Genome-Wide Association Studies of the Rf Gene Cluster in Sunflower (Helianthus annuus L.) and Their Distribution in World Sunflower Collections
Source: Front Genet. 2019 Mar 14;10:216. doi: 10.3389/fgene.2019.00216 (PMC6426773; doi:10.3389/fgene.2019.00216)
Supplement: Table S2 — Map position and sequences of SNP markers on LG13 selected from published sunflower linkage maps used for map saturation in the present study. [file Table_2.XLSX]

## Sheet: Sheet1
Table S2 Map position and sequences of SNP markers on LG13 selected from published sunflower linkage maps used for map saturation in the present study
SNP ID	Map position (cM)a	Map position (cM)b	Target sequence
NSA_003887	46.39		CCGCCCATTTGACACCTCTAACAAACCGATGGTTTAGGGTTTCCCAAATCATTTCCTCAAATCATTTTTAGCAAATTTGAGGAAAAATAAAAACATTTTAGAACTCGTAATATATTTAAAAAGGAACTTAAGAACCACTAAGGTACCTTTAAAAAGAAACTCCAGCTTCTT[A/C]CTTGTGCCAATGATTTAATCACATGACTTACGCCATTCCAGATGCTTACTATATTTGTAACAAAATTCCTCATACCCTTTTCAGAGACCTCAAAATGTGAATAGCTAGACCTGTAGCAAGCAAACATAATCAGACGATGGCAAGTTGCAGACGAATTTGATCAATTTCAAGCTTGATTCT
NSA_008361	47.55		ACCATATATCTCCAGAGTAAGCCCTTTAAGGTGTGACTATCAGAACCAAAACATGGTTACTAACTTACTGTGTTTCGGTATTTCCAAAATCAGTTTCCAGCTTCAAATACTTGATACTTTAAAATACAATGAAAGATGAACAGATATACTTTATTGCAAATAAAGTGGAGTGAAAA[-/A]TACACCAAAATCAGACCTGCCACACTGGATGAATCCTCGACCATGCGACCACCTCCAAGTGCTCCCCCAGATACATGGAGTCTAGCATTAACAAAGACCTAAAAAACAACAAATGAACACCTCTGAGCAGTCTGCATGTGTGTGTTAGTGTGTGTACTATGTCTATAACTATATTTGGAAGAAAAAGACGAACTGCTGCG
NSA_007218	47.7		CACCGCCTGACAATTTTTTTTTTTTTTTTGATAGTGAGTTTATTTTTAGGAGCCTTTATACACTTCTTATTTTAAGGAGCCTTTGTATTTGTTCTAATCCAAAATATAGTACTATCTGCTTTATAGGTTGTACACTATAAAGCTTTTTTTTTTTTTTTTTTTTTGTCAAAGATACCCTTTCAATAAAAACGACCCCTCTTAACAGAATTCAAAGTCAACTTAATAAAATATCTAGAGGAAGTAGGCAGGCCGGCAAGATAGGTGCCACCACAGGATGGT[T/G]ATCTCATATCTATTGACTATGCAAAACAATAATTGAAACCTTGAACACATATCACCTGTTTCTTGTACAACCTCA
NSA_007865	47.7		CAGTTAAGTGTCCACTACCCCACTAACTCCCTGAAAATAAGGAACACATTTTAAACCGCATTGCAACCTGTATTTCTGATTGGTGCATCTTGATAAACTGCAGGAAACCGCAAGATCATGGGTGAGAGAGAGCTGAACTGCCGTGAACTGCTGCTTCTAGAAGGAATTTAGAGACTTTATACGGCTGAGATTAAAAGTTGAGGACTTTGAACGGCTGTAATTAGCCCAAAAGACGGTTAGCAACAACGGGAACAATATAATATAGAATTCAAGCCAACCCAGATTTTGTACAAGAAGGTTGAAACTATCACAACTAA[A/C]ATTAGTGATGCACCAGTAATAGGTGTACACAAAATATACAATCTGAAATCTGATTGATCCATTACCAACAAAATACC…
NSA_006174	47.7		ATATAGAAAATAAAAACCACTTAAGTGCCCATTTCCAGAGCCGAAACATCTACACGTACATCTGAACAGCCATTGATGCATGAACATGTCACTACAACAGCATTTGCTCTTGGATGTAAGTTGGATTGTATATTTCGGCTACCAAAAAAGGACGTTAAGTTAATCGATTACCATTGTCCCTACCGATATCAAAATACAAAGCAAAGCAAAGCAAAGCAAAACATAAACAAGAAGCAAGGCATCAAGCATGATTTTAAGAAACAAGAAAAACATTAGA[-/GA]TCCCAACAACATATGTTTTGAAGTTCTGTTTTTTTTATTGTTTTTTCGTCCCCTATCATCTTATTGTTTGTTCATGTTTTTCTTCATT
NSA_001167	47.82		AGAATGGTTGTAGATTAATTTTAAAACATTTGTAACTAGAAGGATTTACCCGTACTACGTGCGGAGAGTTAAGTCAGTATTGATTATGTTAATTACAATAAGAGTCATTTATAGCTACCGACAAAAAGACTCCAAAGGCCCAAAATAGGCTAGCATATGTTTGGGATTAAAATATAAGTAAAAGAAATGGAATTTTAAAAGAAGAAAAAATACTAAATTTTATACTAAGTTCAATA[T/G]GTACATATTATCTTCCATTTTTTTAGTGTCTCCATGCATAAAACACAATGTTTTCACAAATAAACTAACATGGCATGAGAAAAATATGGTCTAGTAAAATGGAAATGGGTACGGTCTCATGCATAAAAAAAATGTTCTCACAAATAAATTAACATG
NSA_001031	47.91		AGAGGATTGAAATCTTCTATTATTATTATTATTAATATTTCTTGGCCTAGTTTGATCCTCTTTCACAATCAAACCAAGGTCAGTTTTCTCCTTAA[T/C]TAGATCTTGTAGTTTGGTGGAAATACCATCTAACTGGGCCAGCATAGTATTACTCCGTGAGAAACCTGTACAACAAGTTGGGGTGATTAGGTTTCTTACCATGTTGGTGATGCCTTCCGACTCATGGGTTGACTCACGTTGCATGTCTTCGGTCAGCCAACCATCGAGGACGTCATCTATGTCATAAGCCAGATGCTGGAGATCATTGAGCCATTGTTTCACAGGTGGACTGGTTATCTCCTTCTGAG
NSA_001915	48.02		CATTTTTTAACGTTAAGTCAGGCGTATTTTCGTCTTTTTAGACATTTTTTGTGAGATTTAAAGAGTGTAGGTGGGGAGAAAGTCAACAGGGGTGAATCTTTATTTCATAGTGTTTTTATTTTAGTAAAAAGGTCTATAAAGACGAAAATGCCCCTCCTTTAATGGAGAAAAATGGATGGAGTTAACGAGTTGGATGAAAATGGCAAGATTTCAAACCTTTTGGATCCAGATGCGAAAAAATAAACCTTTGGACGAAAGTCGCAAAAGTGGCCAAACCTTAGGGATGAAAAATGACATTTTACTCTAAACAAATAGAAAGGTCGTGAACAGAATCACAGAT[A/G]CACTTACTTCATATAGTTTTGGAAATACAGATCTTCACGAACTTTAGAAGTCGC…
NSA_004192	48.59		ATTTGTATCCTTATTTTGAAGGCACTCAACACTCTGAAAAAAGGTACCCAATTAATCAAGTACACCAGGAAGGGGAGACCTAAGTTTCGTTTATTCAGACTCTCAGATGTAAGTTGCTTCATATACTGATTTGTTGAACTGTATGCACTTGGTACACAAGCTTTATCCGAAATTATACATTATTTTCATCGTATTATTGTCCAATTGCATGTTACCTAGGAAAGCATGAAGTTGCTGTTAGTTTAGGTACAGAGAACGAAAACAAAATCCCCATCCTGTTTTTGTGATTCTTGGTCTTCAAGTTTATGCCTTTCAGGCTAGATATATTCTGACTGTGGAT[T/C]AGTTATTTCTTTTTCTGTATGTTAATTCCTGAATTTTCAGCGGCAGCCAAACTA…
NSA_001379	48.76		CGGTTCGGTTTGGTTTAGTGAAACACCAACAGGCCACAACCAAACCGATGGATTGAACTTTTCTTGAATGGTAAAGAACACTTACAGTCCCGTAAATCAGATGAATATTTTACCTTAAACAGCATAAAGCCGCACGACTTGTTCAATCTTGGTTCGACAAACAGGGCAACCCCAATTCTTATCCTTGATTTCATTCAAACATGTCAT[A/G]CATCCAGCCATGTGACCACAAGGAATGCACGCTCCCTCAACCGGTGCATCCAAACATATAACACACGACGAAGAATCATTATCATTTTTCTCCTTCTCAGATTGATCATTAGTGTTGGGATCAATCGATGGGTAGTGAACCGGACCATCATCCATCATTTCTGGCAATAGTG
NSA_009962	48.87		AAAATCTGATTCGATTAATTCGAAAATCCGTTATGCGATTCGTTGAACACCCCTGACCTATTCACAAAAAACATAATGCAACCAGATAACACAACATATTTATCACAATGCACAGGTTGACTTATATCTACTAATCATGATATGTAGATCAACATGAAAATTACCTTGCAGTTTGCAGCGGCATGCTTCTCGAGAGCGGAAGCTTGGGACTTGTAAATTGAAACGTTTTTGGACATCACGTCTTTTCTTTCCATTCCTTCTTTCCTGGGAAACCCACCCACCATGAC[A/G]GCTACATTCACACCCTTGCATGCCTCCTCAACATCGGTAGTGGCAACAACACCTGATATAAGCGTTTCAATACATTTTGTATACAAGAAAGACGACTCACAAGTTCA…
NSA_007181	51.48		TTCATAAAATCAAAATCAAGCTGAGGAAGTTATCTTGAAGAGACGTACTGATCTCAAGGAAACCTTCAAGCTCAACGGTGAGGCATATTTCAATTTCTTCAAGGCGGATTCGCACCATACGTCACGAGTTTTCGCAGCTTCACTTTCCTGTCGGTTTTTCATATTCGTACTCTTTAAAAACTGAAACGTTAAATTATTCAGTGTAAACCTTTTCAAATTTTACCAAGGCGTCAATGATTTCCTCAACACTGTCATGACC[A/G]AAACATTTATCAACCATTTCCAACCTAAAAACATGAACGTAAATCATTAGCTTATGCGTAACATCAAAGCACCTTAGTAAAGATAATTCATAAACAATAAAAGTTCACCTCTTTAGAACACTATTATTATCAGGA…
NSA_006846	55.98		ATTTTTTTTTGTTTTGATTTATCGAGATTTTACTATAAATGAATGTTCTTATGTAGTGGAAACTAACAATGAGGCATATCACATATGTGTAGATTATAGAAACCTATATATAAAAAAGAAAAACATAATTTACAACAGGGCAACATTCATAAAGAAAGAGAACACCTTGCAGTATAAGTTACACTTCATACATAATAAATACCAAACCGCCAAACGAAACAAACAGGTTAAGAGAAACACTGCGGATCCCTGATCAAGATCAGGGTTCGATGATAAAGTTAACAAAAATACAATCAAGATTGTATAAATTAGAAAACTCACCAAGAAGTAGGGACTCAAGATTGCATAGTAACCTTCTC[A/G]TTAAAGTCTTCGGTAATACTGGTCAAAACAGGTTC…
NSA_005643	58.16		TTTTATTCATTTCTTACTTTCTAAGTTTTGATACTTTCTAGCGATGGTATCTTAAGCAATGTTACGAAAAGCTTAGAAATTGTTTAACTAATTGAATCTTTTTCAATATAATCAAACAATGAATATAACAAGAAAAACTCGTTAACTAAAATTGAAGGATCATAAACCCGAAGTTATAATCCCTATTTATAATAAACAACTCCTTCGAGAACAAGTAACCTACTCTTATAAGAAAA[T/C]CAAATAAAATAAAACTACTATGAATACTATATATTCCACCTAAAATGAACTAAACATTTAGCATCCTCCAATTTTTTAGTTATGACAAGATTAGTTCTAACAATCACCC
NSA_002251	69.03		AAGTATTGGGACATTGTATGAAGCAGCAGGCAAGCTTGACCCCATGCAGCATTTATCTCATCCCACTCAACCTAACAAACAAAGATTTAAACAAGAAAACATCTTGACAGCAAGCAAGCCCACCAATTTGATTATAAGTGCAAGCAACATACTGGAATTTTAGGCAGTCTTCCCAGCCTGAAATTGTTAATTGTTCC[A/G]AATTCTCCATCATACCAAATTGGAAATGCATCATTCAGGACATTCGTTCTCTTCAGAAGTTCTAAATGTGCTTGTGATACTTCTATTTTGGCCAATATTGCATCTCTCTCTTCCTGCCAGCCACAACAAACAGAGTTTAATATTACAAAGGTCAAAGAAAGCAACTAACTGCCTGCCTAACATATAATATTATATCT…
NSA_004217	69.03		ATACATATTAGTCTGGTTAATGATGCCAAAAAAAAGAAGATAAGGTGAAAGAAATGTAATTACCAGATCCACGAGGCAAAAAATCCTTGCCAACAACGCTCTCCAGCACAGATGACTTTCCAGAGCTCTAGAATGACATGAAAAGTTATGAGGAAGGGCTGGCTTGGTTGTGAATGAGAGGAGAGGAGGTTAACTATTTTC[T/G]AGGTCTATAAATATAATCCATAAAAGTGCAGTGCAGAGCAGATCTAAAAGTAAAAGCTACTACGACTAATAATGATTGATGCAAATGAAGATCTGTGGACTGGATCTGAAGAGCGAGAGAAGTACC
NSA_004837	69.03		AGGACCAATGAATCTTCCAAATGTATATGTACCTTTAGCCTGTGGTCACCACCAACCTGCATGGTACATCAGCTCACAAAAGGGCTTGTAGGTTTGAGGTTCATCATTTCAATATAGTGGAATCTTGTTTCTTTTTAATTTTGACCCACCCGTTTAGTTGTTTCTGCGGATTTGGAAAGGGATTTGGGTTCTTGTATACTCATGGAGAACCACACCAAAGTTAGTAGGACACAAATTTCCACCCTCAAATATTATATTTGTAGCACTTTGTTATGTCCCTAAAAGTATTGTAGCCTTTTCGTTTACCTTGTTGAGTCCATATAGTCAGTCAGGTTCAAGGGAACTTGGAGA[T/G]ATTAAAGTGCAGAATTTGAAATAGTTTGCTGCTGGCTTGATTT…
NSA_004921	69.03		ATTGCTGGATTTTTGAGTTATTAATAATCACGCCGGCCGGGCGAACCCAGAAGAAGAATATAACACAGCAACACACTTTATTATTGCAACAGAAGATTCTCATCCCTAATCACTCAGCAGGTATATCATCCATCTCCTTTACTATTATTATTATGCAATTTCATGTTCGTAATCCCCAATTGGTACTAACAATCGTTCGTGACTCATGAACTAGTGTTGAAGATAAACCTAATTTTCGTATAGTTTTAATTGTTGAATTTAGGGTTTTGTTGCTTCAGATAGAGAGATTAGGACTTTTTAACTATGTTGTTCAGTTGACCGACCTTATTATTTTGACAAAATGTTTTTTAT[T/C]AAGTCTCTCTGTCTGTCTGTAGGTGAAACTATAATCTCTCTAT…
NSA_009954	69.03		CCAAGTAGATAACATGCCACAGTTGAGACTTGCACCGCCAGCTGTCTATCAAGAAAAGGTGAAGAAGGGAGTTGCTATGTTGAGGGGGGAAAGTAGCGGTGTTGGTGGTGGTCTTGCTAACAAAATGAAGACGGGCAAGCAAATTAAAGATCTGAAAACAAAGGGACCAGCTGTTCGATTTCCCTTGAAATCAAACATATTTGG[T/C]AAGATTTCTGCTTGAAAAACTCAGATTGATCTCCATGCCTTTTTGACATCCAACAACCCATCTGTTTTTATTTTGCAGGCAAGGAAAAGACCAGCAGAAGATGACATAAACCATGGGCGGTGGGGGGTATTATGCACAACTAACTTGTACTATAATTATACGATGAAAGCCAACACTCAGGCAAGGGATC…
NSA_002430	70.18		CTCTTTGCTGCTTTGACCCTTCTTTACATTATCATCATCTTCATCAAAATCAGGAGGCATGTCATCATCTTCGCCGTCATCATCATCCTCACCCATTTCATTGTCTACTAGATCATCAAAATCCGACCAATCCTCCTCTTCCTCCTCCTCCTCCTCCTCTCGATCATCCGAATCAGTTTTCACCACACGCCCTCTAAACCGAGGAACA[A/G]CAACCAGAGCACGAAGCTTTTCTTTAATCAGCAACAACCGATTCTTATCAACCAACTGAGAATCACGATACGCATCCCTCAGAAAAACAGAGTCGCGGTCTCCTTTTAACGATACATAGAACATATCCGGGTGTCTTATAAGCATCCCTCTAAGCTGCTGAGAGAATCTAAACTCCTCTCGAAAAT…
NSA_005890	70.18		ATATATCAGTGGCATCAGGCAACCAACTGGAGCACTTGAATGATAGTTACTCTGTGACTTCAGAGCAGTACACAAGTGTTGGTGGTGTTGCAGTTGAGTTCTGCGTTCACATCAAGAGAACCGACATCCTGTTTGATGAAATTTTATCCCGTTTTGAGTCTGTTAAACAAAAAGGTACACCGTATTCCTCTTTGCACATGTTTTTTATAATCAATTTTTTT[-/T]GGCTCTGCCTAAATTGAATTATGCAGGTTTTATATTTCTATTAATCTTGTGTTTTCAGAGACATTTTTGGAGCTTTTGGAGCCATATATTTTGAAGGACATGCTTGGATCACTTCCACCTGAGGTATTTCTTGTTTATATCTCTTGCATGCTTGTAAT
NSA_007922	70.18		GACAAGAAGCTCCAACTGGTCATGAAAATTCGCAAGATTTTGCTGAGTCAGCCTGATAGGGTTATGCAGCTTCGTGATTTGGGTAGGTTTAGAAGAGCATTAGGGCTTCAAAAACGGCGCCGCTTTATTGCGCTTTTGAGGAAGTTTCCTGGGGTGTTTCAGATTGAGGAAGAAGGGGTTTACTCTCTCAGATTTAAGCTAACACCTGAGGCTGAAAGATTATATTTGGAGGAGATGAAGGTTAGAAATGAAATGGAAGGTTTGTTAGTAGTTAAGCTAAGAAAGTTGCTCATGATGTCCTTAGATAAGCGTATTCTTATTGAGAAGATAGCTCATTTGAAAACTGATCTTGGGCTGCCTTTGGAATTTCGAGATACCATATGCCAACGATATCCGCAG…
SFW02101		45.13	ATCCAAGGTCCCNAAAAGCTTCCTATTGTCGATTATCGGTGAAGATCGTGTTACGAAATT[T/C]GTCATTCAAGAAATAGTTAGCTCCACAATGGCTGATTATGTGAAGAAGAACAATATTCC
SFW03371		45.13	ACTTGCTGGTAAAGATTCAACTTCAACTGCACTCACATGGTTCTTTTGGCTATTAGACGG[A/G]CACCCGCATTGTAAACACATGATCCACAAAGAAATATCTATGTTAATGACCTCAACCCA
SFW01515		45.45	ATAAACTCCTAGATATTAAAAACACGNTTCGTTCATGTTATTAACCGTCCACTAGTCGCC[A/G]ACTTTTTCCGACTAACTTTGAAACACAATGAGCAGATTGAATTTGTAGTTTGATCTATT
SFW04100		45.51	AACGGTTATACCAATGCTTGAAGCTGTCATGGAAGTTGTGCCTGTTGAAAAGCTTGCGGT[T/G]CACTTTCACGACACTTATGGTCAATCACTTCCAAACATACTNNTATCCCTTC
SFW04577		45.51	TTTGAAAGTCAACTGCACTGTCGGAGTGGTGGTTTCGGCAACACATTGCCCTAGACATTC[A/C]ATTCAAGTCCCCGAATCCGATATNGGATCAAATTTCGGTATGTTGCTNGAAAACATGGA
SFW01741		45.68	CGACTGCCGTGTACAAGGTGTCATCTGTTGCCGCTCA[A/C]AGTGGCATTCCCATCATTGCCGATGGTGGCATTTCGAATTCCGGACACATNGTCAAAGC
SFW07224		46.2201	ANTTTCTGCGTCTTGCCCGTTGAATATCTCCTCATGCTCGAAAAATAATAGCCCTAACTC[A/G]TTGAAGAAATGTTTTTCTTCTTTACCTACTTCACTCACTTTNCAAACTTCNGTTAAACC
SFW06095		62.05	AATAAAAACTTCAAAAAAATAAATGAAACAAATTCACAGTACATTCAGTTTTAGTTTCAA[T/C]CCCTATCAAAAGATGTAAATAACTCAAGACATATTCTACAAAACCGCTAACANCGATCA
SFW08283		62.05	CATTTGCGATAGAGTTCTTGTGTGGGTGAACAAAGAGGGGATTGTCGTGAGTACCCCTAC[T/C]GTTGGCTAGAAAAAACAAGTTACTATAGAATCATGCTTYGTGATTCTAATATAAGACGT
SFW00936		62.14	TGATACAACTTCAGCCTTGTTTTCACACGATCGCTTGATAGCATATGCAAACGCATCAGG[A/G]TCCCTAGCCATTAACGCGTGTATGTTCTTTTCTTGCCACTCGAAAAATTCAGCATCTCT
SFW05792		62.14	CCCCAACCNATCTTTATCAAAGGCACCTGGTTTTCTTCTCACTTCAACCTCTCCATCACC[A/G]ACGGCTCTAACGCTTGGANCTGCACCGCCTCGGAAGATGAGGTTGCAGAGCGAGCATCT
SFW08145		62.14	ACGTGGGTACTCGGAGACTGTTGATCTTATGCTCAATCTTCAAACAAATGATCAGTCCTC[T/C]TCTTCAACTGATCTCAAGGATAAGAAGTTGCAGAATTCAGCTAGCAA
SFW08188		62.14	TGCCACCCACTCTTCCAGGTTCATCCCATTGAAGTGAGGCCAGTTCTTGTCACGCTTTAG[T/C]GTGTTTTTGTTTTCCGAACCGGGTAGGTGGTTTTCATTTCCGTAATGTAAGATGTTACA
SFW05240		62.5021	AGGGCAAAGATTCGGTCGAAGAAGATGAGNCGTTAGTAAAAGAGGAGTGTTACTATTCGT[A/G]TGGCGAGCAAGGATGATATAGGTTTATAACGAGTATAATAAATCGATATTGTTATTTAC
SFW07278		62.6794	AAGATAATGGTGAAATTAGTGAAATTAGGGTTTCAGGAGTTAATGATAATGGTGAGATTG[A/G]AGAAGAAGAAGAAGAAGAAGAAGGAGNNGGATCTAAGGACGATGAANGAGCACATTGAG
SFW08392		62.6794	AATCAAGCCCGAGATGATCGGTCACTACCTTGCGGAATTCTCAATTTCATACAAGCCCGT[T/G]AAGCACGGTAGACCTGGTATTGGTGCCACCCACTCTTCCAGGTTCATCCCATTGAAGTG
SFW01499		63.4297	CTTAGTGAAGCTCAAAAGGAATGACAAAGAGGAGAAGGTTAAGGCTAATGTGCATAAGGA[T/C]GACAAAGGGGTTTTTCATNTTAACAACATTGTTCAGGACCATTCCTAATTAAACNGTGT
SFW05630		63.4297	ATCAATATGTGAACAAGTTGAGCAAGGCAAAACATCATGGCCAGAGCTCGTTGGGGAGAC[T/C]GGAGAATGTGCAGCGACGACTATAAAGAATGAAAACCCGTTGGTTAACACACGAATCAT
SFW01277		64.3162	ATCTTCACGTTGATGGTGATACCGAATTGATCCATGATCTAGCACACTCGTATTTGGTGC[A/G]ANTAGACACACGGAAGTGGANTGGAAAATGGTTCANGCTAAAAGGGGCATAACTTTCAT
SFW01497		64.3162	ATCAACGACCTCACAACCNGCCTCGCCGTTCCTTGCTGCCTATCATGACTTGTCATCACT[T/C]CTTGAACCAATGGTGCCACCCTCATGGACCATGCAATCACCAATGAGGCAGANGGATCC
SFW05832		64.3162	GGTGCCACGGAATCCGAACAACGGGATAACGGCATTAGCCGATCGCAACCTCAAGG[A/C]ATGTTAGCGGATGAATTTCCGCATCTAGATATCATCAATGATCTACTCGATGACGAGTA
SFW02338		64.4528	TTGGGAACGATGCATGCAAATTGGGATCAATGGACTTATCCAAAANCCGGTTCTTTTGAA[A/G]GGTATTGCTGATGAGTTAAGGAGAGTGTTAATCCAAGCCAATAAGGTCTAATGAAGTCA
SFW00757		65.4357	CGGTTCTACGCATTGATTCACTAACCGATAGNTATTAGGTTCGAGTTACTCACTCGRACC[A/C]GTTAGGGTCTTGTTTTAACTTGCCTTTGGATCGTGTAAAGTCACGTGTATGACTTTATG
SFW09223		65.6542	TCCATGGATTGTGCAAAATGCCAACAACGAAGCATCAATAATTAGACGCCACATTGAGCT[T/C]GCACTTTGTCATTTAGCACAACACG
SFW04948		66.091	AACCGCCACACAGTTCACACCGGCATCCTTATACTGAAATATGATCGGATTACTCTCCCA[T/C]TCCTTGTTTCGCGCCTCAATNGCCTNNGCATCGTGCGACTCAATCGCTTTCTGGATCAA
SFW01210		66.3095	AAACCCGAAGTATCTTTCAATGTTGAATCACCTTCGGTTTTATCTCCCTCAAGTTTATCC[T/C]AAANTGAACAAAATTCTTTTTCTGGATGATGATATTGTGGTTCAAAAAGACTTAACGGG
SFW04165		66.5279	CATTAAGAGAGTAAAGGTTGAGCAAGAGGTTGAATCAGATGTTAGTGCTG[A/C]ACGTGAANCAGAGCCACAATCAGTAGAGAAAACTGCAACAGCTGTAGAGCAGCCAATGG
SFW03970		66.6917	TGTTTTGCCCAAATTTTCTATCGATCAGCGTACARACTTGATTAGTTCGTATGATTTTCT[T/G]GGAATAAATTACTATTGCGCGGAGTTTGCTCAATATCAACATCCATCTGATGGAATTTC
SFW05453		67.0194	TGAGAAGAATCTTGCTCGTTTTTTCCTATTGTTTTCGAGCTTGATAAGATGTGAGCATGG[A/G]TCGTATGAGGTCCAGGTAGCACTTAGTGAAATGCTTAGCTCTTCAGTCGGYCCTATTCT
SFW08875		67.0194	GAAGGAAAGGGATGTGTTTTCACATATGATGCCGTTGGATCGTATGAGAGGGT[T/C]GGATACAGTGCTCAAGGTTCTGGTGCNACCCTCATCACTCCGTTTCTGGATAACCAGCT
SFW04275		68.6362	TTCGATCATACGCAATGTACATGCTACAAAAGCAATAGCTGAATTTGGAGTTGTTTTCTT[A/G]CTTTTTAATATTGGCCTTGAG
SFW04317		68.7248	GTTGTCTTCGGCGGAATCTGAAGGTTGACCTTTAGGTTTGGCCACAATGCGAGAAAACCC[A/G]TACCCNAGAGAGCTTCCGCTAGTTTCACACAGCTCTGTTAGTTCTGANAGGTGACGGGA
SFW05743		69.0794	TCAACTTCGATTACAAAACTTTCGATCCCCACTTGANAGATCGAGAAAGATGGTGAGTTC[A/G]TCAGTCGTTAACACATACCCTTTATCGAGCTACTCTTTCGGCACAAAAGAACCCAAAAT
SFW08202		69.3113	TGGATGTTGCCGTGGGCAGGGTGGGTCCATGCACATGTTCTCCGCCGAACACAATGTTCT[T/C]GGTGGNNNNTNNNNTTTGCNNNGTTTATCGGAGAAGGGATACCGGTTGCCACAGGNGCA
SFW06597		70.8329	GAAGAACGGGATTTGGGATTTGGTTGCGAAAGAAATAGGGTGCGATTCGAAGTCTTCGGC[A/G]AGCTTGAAGGTGGTTTACGTTAAGTATCTAGACTTGTTGGATGAGTGGTTTTTGAAAAC
SFW03174		71.75	TTCCCCACTTAARACCCCAATTCAATGGCACNAGNTTAGTCCTTATATCCTCTGTTTTCA[A/G]CTCTGCTTTTGCCAAAGCACTTACTTATGAAGAAGCACTTAACCAATCAACAACAGCCT
a taken from Talukder et al. (2014)
b taken from Bowers et al. (2012)
