# Supplementary material for: Linkage Mapping and Genome-Wide Association Studies of the Rf Gene Cluster in Sunflower (Helianthus annuus L.) and Their Distribution in World Sunflower Collections
Source: Front Genet. 2019 Mar 14;10:216. doi: 10.3389/fgene.2019.00216 (PMC6426773; doi:10.3389/fgene.2019.00216)
Supplement: Table S3 — Allele-specific polymerase chain reaction (PCR) primer sequences of polymorphic SNP markers mapped in this study. [file Table_3.XLSX]

## Sheet: Sheet1
Table S3 Allele-specific polymerase chain reaction (PCR) primer sequences of polymorphic SNP markers mapped in this study
SNP ID	SNP primer	Primer sequence (5'-3')
NSA_001031	NSA_001031F1	GCAACAGGAACCAGCTATGACCCAAGGTCAGTTTTCTCCTCAAC
	NSA_001031F2	GCAACAGGAACCAGCTATGACATGACCCAAGGTCAGTTTTCTCCTTCAT
	NSA_001031R	GAGTCGGAAGGCATCACCAA
NSA_001167	NSA_001167F1	GCAACAGGAACCAGCTATGACGACACTAAAAAAATGGAAGATAATATGCACA
	NSA_001167F2	GCAACAGGAACCAGCTATGACATGACGACACTAAAAAAATGGAAGATAATATGTCCC
	NSA_001167R	TCCAAAGGCCCAAAATAGGCT
NSA_001379	NSA_001379F1	GCAACAGGAACCAGCTATGACGGTCACATGGCTGGCTGC
	NSA_001379F2	GCAACAGGAACCAGCTATGACATGACGGTCACATGGCTGGACGT
	NSA_001379R	GGTTCGACAAACAGGGCAAC
NSA_006174	NSA_006174F1	GCAACAGGAACCAGCTATGACGAACTTCAAAACATATGTTGTTGGAA
	NSA_006174F2	GCAACAGGAACCAGCTATGACATGACGAACTTCAAAACATATGTTGTTGAGATC
	NSA_006174R	CGATTACCATTGTCCCTACCGA
NSA_007218	NSA_007218F1	GCAACAGGAACCAGCTATGACGGTGCCACCACAGGATAGTG
	NSA_007218F2	GCAACAGGAACCAGCTATGACATGACGGTGCCACCACAGGATGATT
	NSA_007218R	TGAGGTTGTACAAGAAACAGGTGA
NSA_007865	NSA_007865F1	GCAACAGGAACCAGCTATGACCCTATTACTGGTGCATCACTCATG
	NSA_007865F2	GCAACAGGAACCAGCTATGACATGACCCTATTACTGGTGCATCACTACTT
	NSA_007865R	AGCCCAAAAGACGGTTAGCA
NSA_008361	NSA_008361F1	GCAACAGGAACCAGCTATGACGCAGGTCTGATTTTGGTGCAT
	NSA_008361F2	GCAACAGGAACCAGCTATGACATGACGCAGGTCTGATTTTGGCGTA
	NSA_008361R	CAGAGTAAGCCCTTTAAGGTGTG
SFW01497	SFW01497F1	GCAACAGGAACCAGCTATGACGGCACCATTGGTTCAGGG
	SFW01497F2	GCAACAGGAACCAGCTATGACATGACGGCACCATTGGTTCGAGA
	SFW01497R	CCGTTCCTTGCTGCCTATC
SFW01499	SFW01499F1	GCAACAGGAACCAGCTATGACAAGGCTAATGTGCATAAGAAT
	SFW01499F2	GCAACAGGAACCAGCTATGACATGACAAGGCTAATGTGCATAAAGAC
	SFW01499R	AATTAGGAATGGTCCTGAACAATG
SFW01515	SFW01515F1	GCAACAGGAACCAGCTATGACCGTCCACTAGTCGTCG
	SFW01515F2b	GCAACAGGAACCAGCTATGACATGACCGTCCACTAGTCACCA
	SFW01515R	GCTCATTGTGTTTCAAAGTTAGTC
SFW01741	SFW01741F1	GCAACAGGAACCAGCTATGACAATGATGGGAATGCCATTT
	SFW01741F2	GCAACAGGAACCAGCTATGACATGACAATGATGGGAATGCCGCTG
	SFW01741R	CTGCCGTGTACAAGGTGTC
SFW02101	SFW02101F1	GCAACAGGAACCAGCTATGACAGCTAACTATTTCTTGAATAACA
	SFW02101F2b	GCAACAGGAACCAGCTATGACATGACAGCTAACTATTTCTTGAATGCCG
	SFW02101R	TGTCGATTATCGGTGAAGATCGT
SFW03371	SFW03371F1	GCAACAGGAACCAGCTATGACTCTTTTGGCTATTAGACAGG
	SFW03371F2b	GCAACAGGAACCAGCTATGACATGACTCTTTTGGCTATTAGATGGA
	SFW03371R	GTGGATCATGTGTTTACAATGCG
SFW04100	SFW04100F1	GCAACAGGAACCAGCTATGACGTTGAAAAGCTTGCAGTG
	SFW04100F2b	GCAACAGGAACCAGCTATGACATGACGTTGAAAAGCTTGCGATT
	SFW04100R	GGAAGTGATTGACCATAAGTGTCG
SFW04577	SFW04577F1	GCAACAGGAACCAGCTATGACCACATTGCCCTAGACATCCC
	SFW04577F2	GCAACAGGAACCAGCTATGACATGACCACATTGCCCTAGACACTCA
	SFW04577R	GCAACATACCGAAATTTGATCC
SFW05240	SFW05240F1	GCAACAGGAACCAGCTATGACTCATCCTTGCTCGCTAT
	SFW05240F2	GCAACAGGAACCAGCTATGACATGACTCATCCTTGCTCGTCAC
	SFW05240R	AGGGCAAAGATTCGGTCG
SFW05453	SFW05453F1	GCAACAGGAACCAGCTATGACCTACCTGGACCTCATACAAT
	SFW05453F2	GCAACAGGAACCAGCTATGACATGACCTACCTGGACCTCATATGAC
	SFW05453R	GCTTGATAAGATGTGAGCATGG
SFW05832	SFW05832F1	GCAACAGGAACCAGCTATGACGGAAATTCATCCGCTAACGTT
	SFW05832F2	GCAACAGGAACCAGCTATGACATGACGGAAATTCATCCGCTAATATG
	SFW05832R	GAACAACGGGATAACGGCAT
SFW06095	SFW06095F1	GCAACAGGAACCAGCTATGACACAGTACATTCAGTTTTAGTTTCGAT
	SFW06095F2	GCAACAGGAACCAGCTATGACATGACACAGTACATTCAGTTTTAGTTTTAAC
	SFW06095R	GCGGTTTTGTAGAATATGTCTTGAG
SFW08283	SFW08283F1	GCAACAGGAACCAGCTATGACAACTTGTTTTTTCTAGCCAGCG
	SFW08283F2	GCAACAGGAACCAGCTATGACATGACAACTTGTTTTTTCTAGCCGACA
	SFW08283R	ACAAAGAGGGGATTGTCGTGA
SFW08875	SFW08875F1	GCAACAGGAACCAGCTATGACTTGGATCGTATGAGAGGATT
	SFW08875F2	GCAACAGGAACCAGCTATGACATGACTTGGATCGTATGAGAGAGTC
	SFW08875R	AGAAACGGAGTGATGAGGGT
SFW09223	SFW09223F1	GCAACAGGAACCAGCTATGACGTGCTAAATGACAAAGTACG
	SFW09223F2	GCAACAGGAACCAGCTATGACATGACGTGCTAAATGACAAAGCGCA
	SFW09223R	TGCCAACAACGAAGCATCAA
The tail-sequence is in italic and the additional five-base oligonucleotide insertion in AS-primer F2 is italic and underlined.
