# Supplementary material for: Linkage Mapping and Genome-Wide Association Studies of the Rf Gene Cluster in Sunflower (Helianthus annuus L.) and Their Distribution in World Sunflower Collections
Source: Front Genet. 2019 Mar 14;10:216. doi: 10.3389/fgene.2019.00216 (PMC6426773; doi:10.3389/fgene.2019.00216)
Supplement: Table S4 — Distribution of 24 significant SNP markers in the sunflower evaluation panel identified using GWAS analysis of fertility restoration trait. The black font color indicates SNP allele associated with fertility restoration, while the red font color indicates the alternate SNP allele. [file Table_4.XLSX]

## Sheet: Fertility restorer lines
Table S4 Distribution of 24 significant SNP markers in the sunflower evaluation panel identified using GWAS analysis of fertility restoration trait. The black font color indicates SNP allele associated with fertility
restoration, while the red font color indicates the alternate SNP allele
Line	Rf gene	Linkage group	Pedigree/origin	Genotype of 24 significant SNP markers in the restorer lines of the evaluation panel
				NSA_000042	NSA_000112	NSA_000179	NSA_001031	NSA_001167	NSA_001379	NSA_001915	NSA_002154	NSA_003057	NSA_003720	NSA_003887	NSA_004192	NSA_005156	NSA_005572	NSA_006174	NSA_006543	NSA_006551	NSA_006804	NSA_007131	NSA_007218	NSA_007865	NSA_008018	NSA_008247	NSA_009869
HA 89†	-		VNIIMK 8931 Selection	AA	CC	GG	GG	AA	AA	GG	GG	AA	AA	CC	GG	--	AA	II	CC	AA	GG	AA	CC	AA	CC	GG	AA
HA 234†	-		2*Smena//HA6/HA8	AA	CC	GG	GG	AA	AA	GG	GG	AA	AA	CC	GG	GG	AA	II	CC	AA	GG	AA	CC	AA	CC	GG	AA
RHA 266	Rf1	13	2*Peredovik/953-102-1-1-41= T66006-2-2-7-8	GG	AA	AA	AA	CC	GG	AA	AA	CC	GG	AA	AA	AA	GG	DD	AA	CC	AA	GG	AA	CC	AA	AA	GG
RHA 269	Rf1	13	2*Peredovik/953-102-1-1-41	GG	AA	AA	AA	CC	GG	AA	AA	CC	GG	AA	AA	AA	GG	DD	AA	CC	AA	GG	AA	CC	AA	AA	GG
RHA 270	Rf1	13	2*Peredovik/953-102-1-1-41	GG	AA	AA	AA	CC	GG	AA	AA	CC	GG	AA	AA	AA	GG	DD	AA	CC	AA	GG	AA	CC	AA	AA	GG
RHA 271	Rf1	13	CMS PI343765/HA119//HA62-4-5 /2/T66006-2-1-31-1=T70020	GG	AA	AA	AA	CC	GG	AA	AA	CC	GG	AA	AA	AA	GG	DD	AA	CC	AA	GG	AA	CC	AA	AA	GG
RHA 272	Rf1	13	CMS PI34765/HA119//HA62-4-5 /2/T66006-2	GG	AA	AA	AA	CC	GG	AA	AA	CC	GG	AA	AA	AA	GG	DD	AA	CC	AA	GG	AA	CC	AA	AA	GG
RHA 273	Rf1	13	CMS PI343765/HA119//HA62-4-5 /2/T66006-2	GG	AA	AA	AA	CC	GG	AA	AA	CC	GG	AA	AA	AA	GG	DD	AA	CC	AA	GG	AA	CC	AA	AA	GG
RHA 274	Rf1	13	CMS PI343765/HA119//HA62-4-5 /2/T66006-2	GG	AA	AA	AA	CC	GG	AA	AA	CC	GG	AA	AA	AA	GG	DD	AA	CC	AA	GG	AA	CC	AA	AA	GG
RHA 274 (LP-1)	Rf1	13	RHA 274 with EMS treatment	GG	AA	AA	AA	CC	GG	AA	AA	CC	GG	AA	AA	AA	GG	DD	AA	CC	AA	GG	AA	CC	AA	AA	GG
RHA 274 (LP-2)	Rf1	13	RHA 274 with nitroso methylurea (NMU) treatment.	GG	AA	AA	AA	CC	GG	AA	AA	CC	GG	AA	AA	AA	GG	DD	AA	CC	AA	GG	AA	CC	AA	AA	GG
RHA 274 (LS-1)	Rf1	13	RHA 274 with nitroso methylurea (NMU) treatment.	GG	AA	AA	AA	CC	GG	AA	AA	CC	GG	AA	AA	AA	GG	DD	AA	CC	AA	GG	AA	CC	AA	AA	GG
RHA 274 (LS-2)	Rf1	13	RHA 274 with nitroso methylurea (NMU) treatment.	GG	AA	AA	AA	CC	GG	AA	AA	CC	GG	AA	AA	AA	GG	DD	AA	CC	AA	GG	AA	CC	AA	AA	GG
RHA 275	Rf1	13	CMS PI343765/HA119//HA62-4-5 /2/T66006-2-2-11-3-2	GG	AA	AA	AA	CC	GG	AA	AA	CC	GG	AA	AA	AA	GG	DD	AA	CC	AA	GG	AA	CC	AA	AA	GG
RHA 276	Rf1	13	CMS PI343765/HA119//HA62-4-5 /2/T66006-2-2-11-3-2	GG	AA	AA	AA	CC	GG	AA	AA	CC	GG	AA	AA	AA	GG	DD	AA	CC	AA	GG	AA	CC	AA	AA	GG
RHA 278	Rf1	13	CMS PI343765/HA119//HA62-4-5 /2/T66006-2-2-11-3-2	GG	AA	AA	AA	CC	GG	AA	AA	CC	GG	AA	AA	AA	GG	DD	AA	CC	AA	GG	AA	CC	AA	AA	GG
RHA 279	Rf1	13	CMS PI343765/HA119//HA62-4-5 /2/T66006-2-2-11-3-2	GG	AA	AA	AA	CC	GG	AA	AA	CC	GG	AA	AA	AA	GG	DD	AA	CC	AA	GG	AA	CC	AA	AA	GG
RHA 282	Rf1	13	Boneta Giant Manchurian/ Mennonite RR	GG	AA	AA	AA	CC	GG	AA	AA	CC	GG	AA	AA	AA	GG	DD	AA	CC	AA	GG	AA	CC	AA	AA	GG
RHA 293	Rf1	13	Commander/Mennonite RR	GG	AA	AA	AA	CC	GG	AA	AA	CC	GG	AA	AA	AA	GG	DD	AA	CC	AA	GG	AA	CC	AA	AA	GG
RHA 294	Rf1	13	CMS PI 343863/Bonita Giant- Manchurian/HA61/Mennonite RR	GG	AA	AA	AA	CC	GG	AA	AA	CC	GG	AA	AA	AA	GG	DD	AA	CC	AA	GG	AA	CC	AA	AA	GG
RHA 296	Rf1	13	RHA 274 Resel	GG	AA	AA	AA	CC	GG	AA	AA	CC	GG	AA	--	AA	GG	DD	AA	CC	AA	GG	AA	CC	AA	AA	GG
RHA 297	Rf1	13	RHA 274 Resel	GG	AA	AA	AA	CC	GG	AA	AA	CC	GG	AA	AA	AA	GG	DD	AA	CC	AA	GG	AA	CC	AA	AA	GG
RHA 298	Rf1	13	CMS HA89/RHA273	GG	AA	AA	AA	CC	GG	AA	AA	CC	GG	AA	AA	AA	GG	DD	AA	CC	AA	GG	AA	CC	AA	AA	GG
RHA 299	Rf1	13	CMS P-21 VRI/T70050 T70050=PI343765/HA119 //HA62-4-5/2/T66008-2	GG	AA	AA	AA	CC	GG	AA	AA	CC	GG	AA	AA	AA	GG	DD	AA	CC	AA	GG	AA	CC	AA	AA	GG
RHA 309	Rf1	13	RHA 293 Selection	GG	AA	AA	AA	CC	GG	AA	AA	CC	GG	AA	AA	AA	GG	DD	AA	CC	AA	GG	AA	CC	AA	AA	GG
RHA 310	Rf1	13	RHA 294 Selection	GG	AA	AA	AA	CC	GG	AA	AA	CC	GG	AA	AA	AA	GG	DD	AA	CC	AA	GG	AA	CC	AA	AA	GG
RHA 311	Rf1	13	RHA 294 Selection	GG	AA	AA	AA	CC	GG	AA	AA	CC	GG	AA	AA	AA	GG	DD	AA	CC	AA	GG	AA	CC	AA	AA	GG
RHA 324	Rf1	13	R811//Jumbo Israel/RHA 268	GG	AA	AA	AA	CC	GG	AA	AA	CC	GG	AA	AA	AA	GG	DD	AA	CC	AA	GG	AA	CC	AA	AA	GG
RHA 325	Rf1	13	R811-3	GG	AA	AA	AA	CC	GG	AA	AA	CC	GG	AA	AA	AA	GG	DD	AA	CC	AA	GG	AA	CC	AA	AA	GG
RHA 326	Rf1	13	RHA 293/RHA 294	GG	AA	AA	AA	CC	GG	AA	AA	CC	GG	AA	AA	AA	GG	DD	AA	CC	AA	GG	AA	CC	AA	AA	GG
RHA 327	Rf1	13	RHA 294/3/R811//Jumbo Israel/R268	GG	AA	AA	AA	CC	GG	AA	AA	CC	GG	AA	AA	AA	GG	DD	AA	CC	AA	GG	AA	CC	AA	AA	GG
RHA 328	Rf1	13	RHA 294/3/R811//HA 292/ RHA 282	GG	AA	AA	AA	CC	GG	AA	AA	CC	GG	AA	AA	AA	GG	DD	AA	CC	AA	GG	AA	CC	AA	AA	GG
RHA 329	Rf1	13	RHA 298 and 299/Nonoilseed Composite	GG	AA	AA	AA	CC	GG	AA	AA	CC	GG	AA	AA	AA	GG	DD	AA	CC	AA	GG	AA	CC	AA	AA	GG
RHA 330	Rf1	13	RHA 298 and 299/Nonoilseed Composite	GG	AA	AA	AA	CC	GG	AA	--	CC	GG	AA	AA	AA	GG	DD	AA	CC	AA	GG	AA	CC	AA	AA	GG
RHA 331	Rf1	13	RHA 298 and 299/Nonoilseed Composite	GG	AA	AA	AA	CC	GG	AA	AA	CC	GG	AA	AA	AA	GG	DD	AA	CC	AA	GG	AA	CC	AA	AA	GG
RHA 332	Rf1	13	RHA 298 and 299/Nonoilseed Composite	GG	AA	AA	AA	CC	GG	AA	AA	CC	GG	AA	AA	AA	GG	DD	AA	CC	AA	GG	AA	CC	AA	AA	GG
RHA 333	Rf1	13	RHA 298 and 299/Nonoilseed Composite	GG	AA	AA	AA	CC	GG	AA	AA	CC	GG	AA	AA	AA	GG	DD	AA	CC	AA	GG	AA	CC	AA	AA	GG
RHA 334	Rf1	13	RHA 298 and 299/Nonoilseed Composite	GG	AA	AA	AA	CC	GG	AA	AA	CC	GG	AA	AA	AA	GG	DD	AA	CC	AA	GG	AA	CC	AA	AA	GG
RHA 344	Rf1	13	RHA 274 *2/Pervenets	GG	AA	AA	AA	CC	GG	AA	AA	CC	GG	AA	AA	AA	GG	DD	AA	CC	AA	GG	AA	CC	AA	AA	GG
RHA 345	Rf1	13	RHA 274 *2/Pervenets	GG	AA	AA	AA	CC	GG	AA	AA	CC	GG	AA	AA	AA	GG	DD	AA	CC	AA	GG	AA	CC	AA	AA	GG
RHA 346	Rf1	13	RHA 274 *2/Pervenets	GG	AA	AA	AA	CC	GG	AA	AA	CC	GG	AA	AA	AA	GG	DD	AA	CC	AA	GG	AA	CC	AA	AA	GG
RHA 347	Rf1	13	RHA 274 *2/Pervenets	GG	AA	AA	AA	CC	GG	AA	AA	CC	GG	AA	AA	AA	GG	DD	AA	CC	AA	GG	AA	CC	AA	AA	GG
RHA 348	Rf1	13	RHA 274 *2/Pervenets	GG	AA	AA	AA	CC	GG	AA	AA	CC	GG	AA	AA	AA	GG	DD	AA	CC	AA	GG	AA	CC	AA	AA	GG
RHA 354	Rf1	13	RHA 310 *2/Pervenets	GG	AA	AA	AA	CC	GG	AA	AA	CC	GG	AA	AA	AA	GG	DD	AA	CC	AA	GG	AA	CC	AA	AA	GG
RHA 355	Rf1	13	RHA 310 *2/Pervenets	GG	AA	AA	AA	CC	GG	AA	AA	CC	GG	AA	AA	AA	GG	DD	AA	CC	AA	GG	AA	CC	AA	AA	GG
RHA 356	Rf1	13	RHA 274 *3/DDR	GG	AA	AA	AA	CC	GG	AA	AA	CC	GG	AA	AA	AA	GG	DD	AA	CC	AA	GG	AA	CC	AA	AA	GG
RHA 357	Rf1	13	RHA 274 *3/DDR	GG	AA	AA	AA	CC	GG	AA	AA	CC	GG	AA	AA	AA	GG	DD	AA	CC	AA	GG	AA	CC	AA	AA	GG
RHA 358	Rf1	13	RHA 274 *3/DDR	GG	AA	AA	AA	CC	GG	AA	AA	CC	GG	AA	AA	AA	GG	DD	AA	CC	AA	GG	AA	CC	AA	AA	GG
RHA 359	Rf1	13	RHA 274/DDR	GG	AA	AA	AA	CC	GG	AA	AA	CC	GG	AA	AA	AA	GG	DD	AA	CC	AA	GG	AA	CC	AA	AA	GG
RHA 360	Rf1	13	RHA 274/DDR	GG	AA	AA	AA	CC	GG	AA	AA	CC	GG	AA	AA	AA	GG	DD	AA	CC	AA	GG	AA	CC	AA	AA	GG
RHA 361	Rf1	13	RHA 274/DDR	GG	AA	AA	AA	CC	GG	AA	AA	CC	GG	AA	AA	AA	GG	DD	AA	CC	AA	GG	AA	CC	AA	AA	GG
RHA 362	Rf1	13	RHA 274/DDR	GG	AA	AA	AA	CC	GG	AA	AA	CC	GG	AA	AA	AA	GG	DD	AA	CC	AA	GG	AA	CC	AA	AA	GG
RHA 363	Rf1	13	Hysun 33/RHA 274	GG	AA	AA	AA	CC	GG	AA	AA	CC	GG	AA	AA	AA	GG	DD	AA	CC	AA	GG	AA	CC	AA	AA	GG
RHA 367	Rf1	13	NS-H-26(Novosol)/RHA 274	GG	AA	AA	AA	CC	GG	AA	AA	CC	GG	AA	AA	AA	GG	DD	AA	CC	AA	GG	AA	CC	AA	AA	GG
RHA 373	Rf1	13	RHA 274 / 82ROM-R31	GG	AA	AA	AA	CC	GG	AA	AA	CC	GG	AA	AA	AA	GG	DD	AA	CC	AA	GG	AA	CC	AA	AA	GG
RHA 374	Rf1	13	Selection from ARG-R43	GG	--	AA	AA	CC	GG	AA	AA	CC	GG	AA	AA	AA	GG	DD	AA	CC	AA	GG	AA	CC	AA	AA	GG
RHA 375	Rf1	13	RHA 296 / RHA 266	GG	AA	AA	AA	CC	GG	AA	AA	CC	GG	AA	AA	AA	GG	DD	AA	CC	AA	GG	AA	CC	AA	AA	GG
RHA 376	Rf1	13	RHA 296 / RHA 266	GG	AA	AA	AA	CC	GG	AA	AA	CC	GG	AA	AA	AA	GG	DD	AA	CC	AA	GG	AA	CC	AA	AA	GG
RHA 377	Rf1	13	RHA 299 / / Sorem HT 58 / RHA 801	GG	AA	AA	AA	CC	GG	AA	AA	CC	GG	AA	AA	AA	GG	DD	AA	CC	AA	GG	AA	CC	AA	AA	GG
RHA 381	Rf1	13	USDA 1869-3/3* RHA 274	GG	--	AA	AA	CC	GG	AA	AA	CC	GG	AA	AA	AA	GG	DD	AA	CC	AA	GG	AA	CC	AA	AA	GG
RHA 386	Rf1	13	Selection from population 82 Rom. R-line Bulk	GG	AA	AA	AA	CC	GG	AA	AA	CC	GG	AA	AA	AA	GG	DD	AA	CC	AA	GG	AA	CC	AA	AA	GG
RHA 387	Rf1	13	RHA 274/83 Rom. R-line Bulk	GG	AA	AA	AA	CC	GG	AA	AA	CC	GG	AA	AA	AA	GG	DD	AA	CC	AA	GG	AA	CC	AA	AA	GG
RHA 388	Rf1	13	RHA 274/Felix	GG	AA	AA	AA	CC	GG	AA	AA	CC	GG	AA	AA	AA	GG	DD	AA	CC	AA	GG	AA	CC	AA	AA	GG
RHA 389	Rf1	13	C2 RFSS (DMRRS)	GG	AA	AA	AA	CC	GG	AA	AA	CC	GG	AA	AA	AA	GG	DD	AA	CC	AA	GG	AA	CC	AA	AA	GG
RHA 391	Rf1	13	START	GG	AA	AA	AA	CC	GG	AA	AA	CC	GG	AA	AA	AA	GG	DD	AA	CC	AA	GG	AA	CC	AA	AA	GG
RHA 395	Rf1	13	Selection from downy mildew resistant restorer line synthetic (DMRRS)	GG	AA	AA	AA	CC	GG	AA	AA	CC	GG	AA	AA	AA	GG	DD	AA	CC	AA	GG	AA	CC	AA	AA	GG
RHA 396	Rf1	13	Selection from downy mildew resistant restorer line synthetic (DMRRS)	GG	AA	AA	AA	CC	GG	AA	AA	CC	GG	AA	AA	AA	GG	DD	AA	CC	AA	GG	AA	CC	AA	AA	GG
RHA 399	Rf1	13	RHA 274/ODESSKIJ 91	GG	AA	AA	AA	CC	GG	AA	AA	CC	GG	AA	AA	AA	GG	DD	AA	CC	AA	GG	AA	CC	AA	AA	GG
RHA 400	Rf1	13	AUSTRALIA 85 R-LINE POP	GG	AA	AA	AA	CC	GG	AA	AA	CC	GG	AA	AA	AA	GG	DD	AA	CC	AA	GG	AA	CC	AA	AA	GG
RHA 408	Rf1	13	Selected from population Romania R-Line Pop-1,	GG	AA	AA	AA	CC	GG	AA	AA	CC	GG	AA	AA	AA	GG	DD	AA	CC	AA	GG	AA	CC	AA	AA	GG
RHA 409	Rf1	13	Selected from the population Romania R-Line Recurrent Cycle C2	GG	AA	AA	AA	CC	GG	AA	AA	CC	GG	AA	AA	AA	GG	DD	AA	CC	AA	GG	AA	CC	AA	AA	GG
RHA 415	Rf1	13	RHA 274/2696-1	GG	AA	AA	AA	CC	GG	AA	AA	CC	GG	AA	AA	AA	GG	DD	AA	CC	AA	GG	AA	CC	AA	AA	GG
RHA 416	Rf1	13	RHA 274/2696-1	GG	AA	AA	AA	CC	GG	AA	--	CC	GG	AA	AA	AA	GG	DD	AA	CC	AA	GG	AA	CC	AA	AA	GG
RHA 417	Rf1	13	RHA 801/NS-RF POP 3	GG	AA	AA	AA	CC	GG	AA	AA	CC	GG	AA	AA	AA	GG	DD	AA	CC	AA	GG	AA	CC	AA	AA	--
RHA 418	Rf1	13	RHA 801/RHA 274//Myhoco H-9	GG	AA	AA	AA	CC	GG	AA	AA	CC	GG	AA	AA	AA	GG	DD	AA	CC	AA	GG	AA	CC	AA	AA	GG
RHA 419	Rf1	13	RHA 373/ARG 1575-2	GG	AA	AA	AA	CC	GG	AA	AA	CC	GG	AA	AA	AA	GG	DD	AA	CC	AA	GG	AA	CC	AA	AA	GG
RHA 420	Rf1	13	RHA 373/ARG 1575-2	GG	AA	AA	AA	CC	GG	AA	AA	CC	GG	AA	AA	AA	GG	DD	AA	CC	AA	GG	AA	CC	AA	AA	GG
RHA 427	Rf1	13	RHA 409 // RHA 376*2/PUR N. annuus	GG	AA	AA	AA	CC	GG	AA	AA	CC	GG	AA	AA	AA	GG	DD	AA	CC	AA	GG	AA	CC	AA	AA	GG
RHA 439	Rf1	13	RHA 377/AS 3211	GG	AA	AA	AA	CC	GG	AA	AA	CC	GG	AA	AA	AA	GG	DD	AA	CC	AA	GG	AA	CC	AA	AA	GG
RHA 440	Rf1	13	RHA 377/AS 4379	GG	AA	AA	AA	CC	GG	AA	AA	CC	GG	AA	AA	AA	GG	DD	AA	CC	AA	GG	AA	CC	AA	AA	GG
RHA 450	Rf1	13	RHA 324/Primrose	GG	AA	AA	AA	CC	GG	AA	AA	CC	GG	AA	AA	AA	GG	DD	AA	CC	AA	GG	AA	CC	AA	AA	GG
RHA 453	Rf1	13	RHA 344/Inedi	GG	AA	AA	AA	CC	GG	AA	AA	CC	GG	AA	AA	AA	GG	DD	AA	CC	AA	GG	AA	CC	AA	AA	GG
RHA 455	Rf1	13	RHA 440/HO IS R-line	GG	AA	AA	AA	CC	GG	AA	AA	CC	GG	AA	--	AA	GG	DD	AA	CC	AA	GG	AA	CC	AA	AA	GG
RHA 461	Rf1	13	RHA 418/RO 12-13//RHA 274/Dobritch	GG	AA	AA	AA	CC	GG	AA	AA	CC	GG	AA	AA	AA	GG	DD	AA	CC	AA	GG	AA	CC	AA	AA	GG
RHA 462	Rf1	13	RHA 439/IS PH RES	GG	AA	AA	AA	CC	GG	AA	AA	CC	GG	AA	--	AA	GG	DD	AA	CC	AA	GG	AA	CC	AA	AA	GG
RHA 463	Rf1	13	RHA 440/PSC 8	GG	AA	AA	AA	CC	GG	AA	AA	CC	GG	AA	AA	AA	GG	DD	AA	CC	AA	GG	AA	CC	AA	AA	GG
RHA 464	Rf1	13	RHA 418/RHA 419/3/RHA 801//RHA 365/PI 413047	GG	AA	AA	AA	CC	GG	AA	AA	CC	GG	AA	AA	AA	GG	DD	AA	CC	AA	GG	AA	CC	AA	AA	--
RHA 468	Rf1	13	RHA 428/3/RHA 426/RHA 419//RHA 440/4/RHA 426/3/RO 12-13//RHA 274/Dobritchthe	GG	--	AA	AA	CC	GG	AA	AA	CC	GG	AA	AA	AA	GG	DD	AA	CC	AA	GG	AA	CC	AA	AA	GG
RHA 801	Rf1	13	Derived from a Restorer Composite	GG	AA	AA	AA	CC	GG	AA	AA	CC	GG	AA	AA	AA	GG	DD	AA	CC	AA	GG	AA	CC	AA	AA	GG
RHA 854	Rf1	13	RHA 273 Selection	GG	AA	AA	AA	CC	GG	AA	AA	CC	GG	AA	AA	AA	GG	DD	AA	CC	AA	GG	AA	CC	AA	AA	GG
RHA 857	Rf1	13	S310/RHA 297	GG	AA	AA	AA	CC	GG	AA	AA	CC	GG	AA	AA	AA	GG	DD	AA	CC	AA	GG	AA	CC	AA	AA	GG
RHA 858	Rf1	13	P1161/RHA 298	GG	AA	AA	AA	CC	GG	AA	AA	CC	GG	AA	AA	AA	GG	DD	AA	CC	AA	GG	AA	CC	AA	AA	GG
RHA 859	Rf1	13	NSH 43/RHA 299	GG	AA	AA	AA	CC	GG	AA	AA	CC	GG	AA	AA	AA	GG	DD	AA	CC	AA	GG	AA	CC	AA	AA	GG
HA-R8	Rf1	13	RHA 377/PI 432512	GG	AA	AA	AA	CC	GG	AA	AA	CC	GG	AA	AA	AA	GG	DD	AA	CC	AA	GG	AA	CC	AA	AA	GG
HA 452£		13	HA 335/HA 412	GG	AA	AA	AA	CC	GG	AA	AA	CC	GG	AA	AA	AA	GG	DD	AA	CC	AA	GG	AA	CC	AA	AA	--
HA 821 (LP-1)£		13	HA 821 EMS treatment, Low palmitic mutant genetic stock	GG	AA	AA	AA	CC	GG	AA	AA	CC	GG	AA	AA	AA	GG	DD	AA	CC	AA	GG	AA	CC	AA	AA	GG
HA 821 (LS-1)£		13	HA 821 with nitroso methylurea (NMU) treatment, Low stearic mutant genetic stock	GG	AA	AA	AA	CC	GG	AA	AA	CC	GG	AA	AA	AA	GG	DD	AA	CC	AA	GG	AA	CC	AA	AA	GG
09-1202-4	Rf1	13	-	GG	AA	AA	AA	CC	GG	AA	AA	CC	GG	AA	AA	AA	GG	DD	AA	CC	AA	GG	AA	CC	AA	AA	GG
09-1205-1	Rf1	13	-	GG	AA	AA	AA	CC	GG	AA	AA	CC	GG	AA	AA	AA	GG	DD	AA	CC	AA	GG	AA	CC	AA	AA	GG
09-383-1	Rf1	13	-	GG	AA	AA	AA	CC	GG	AA	AA	CC	GG	AA	AA	AA	GG	DD	AA	CC	AA	GG	AA	CC	AA	AA	GG
ARG-420	Rf1	13	cmsHA 89*2/H. argophyllus (Acc 420) F4 (34 pl.) bulk	GG	AA	AA	AA	CC	GG	AA	AA	CC	GG	AA	AA	AA	GG	DD	AA	CC	AA	GG	AA	CC	AA	AA	GG
DES-1474-1	Rf1	13	cms89*2/H. deserticola (ACC 1474)//RHA 274	GG	AA	AA	AA	CC	GG	AA	AA	CC	GG	AA	AA	AA	GG	DD	AA	CC	AA	GG	AA	CC	AA	AA	GG
HIR-1734-1	Rf1	13	cmsHA 89*2/H. hirsutus (Acc 1734)	GG	AA	AA	AA	CC	GG	AA	AA	CC	GG	AA	AA	AA	GG	DD	AA	CC	AA	GG	AA	CC	AA	AA	GG
HIR-1734-2	Rf1	13	cmsHA 89*2/H. hirsutus (Acc 1734)	GG	AA	AA	AA	CC	GG	AA	AA	CC	GG	AA	AA	AA	GG	DD	AA	CC	AA	GG	AA	CC	AA	AA	GG
R-185	Rf1	13	RHA 801 / Odessa Hybrid Bulk	GG	AA	AA	AA	CC	GG	AA	AA	CC	GG	AA	AA	AA	GG	DD	AA	CC	AA	GG	AA	CC	AA	AA	GG
R-188	Rf1	13	RHA 801 / Odessa Hybrid Bulk	GG	AA	AA	AA	CC	GG	AA	AA	CC	GG	AA	AA	AA	GG	DD	AA	CC	AA	GG	AA	CC	AA	AA	GG
RES-834-2	Rf1	13	cmsHA 89*2/H. resinosus (Acc 834) F4(38 pl.) bulk	GG	AA	AA	AA	CC	GG	AA	AA	CC	GG	AA	AA	AA	GG	DD	AA	CC	AA	GG	AA	CC	AA	AA	GG
RES-834-3	Rf1	13	cmsHA 89*2/H. resinosus (Acc 834) F4(38 pl.) bulk	GG	AA	AA	AA	CC	GG	AA	AA	CC	GG	AA	AA	AA	GG	DD	AA	CC	AA	GG	AA	CC	AA	AA	GG
Rf Tub-346	Rf1	13	cms HA 89*2 (Helianthus annuus)/TUB-346 (H. tuberosus) F2	GG	AA	AA	AA	CC	GG	AA	AA	CC	GG	AA	AA	AA	GG	DD	AA	CC	AA	GG	AA	CC	AA	AA	GG
RPEF1	Rf1	13	cms PEF1/Zaria//RHA 274	GG	AA	AA	AA	CC	GG	AA	AA	CC	GG	AA	AA	AA	GG	DD	AA	CC	AA	GG	AA	CC	AA	AA	GG
RPET2	Rf1	13	cmsHA 89(PET2)//RCMG1/*3 RHA 274	GG	AA	AA	AA	CC	GG	AA	AA	CC	GG	AA	AA	AA	GG	DD	AA	CC	AA	GG	AA	CC	AA	AA	GG
SDR27	Rf1	13	-	GG	AA	AA	AA	CC	GG	AA	AA	CC	GG	AA	AA	AA	GG	DD	AA	CC	AA	GG	AA	CC	AA	AA	GG
SDR28	Rf1	13	-	GG	AA	AA	AA	CC	GG	AA	AA	CC	GG	CC	AA	AA	GG	DD	AA	CC	GG	GG	AA	CC	AA	AA	GG
SDR29	Rf1	13	-	GG	AA	AA	AA	CC	GG	AA	AA	CC	GG	AA	AA	AA	GG	DD	AA	CC	AA	GG	AA	CC	AA	AA	GG
SURES-2	Rf1	13	RHA 377/3/RHA 392//RHA 376/SU Res. wild Helianthus annuus	GG	AA	AA	AA	CC	GG	AA	AA	CC	GG	AA	AA	AA	GG	DD	AA	CC	AA	GG	AA	CC	AA	AA	GG
TUB-1709-3	Rf1	13	cms HA 89*3 (Helianthus annuus)/TUB-1709 (H. tuberosus) F3	GG	AA	AA	AA	CC	GG	AA	AA	CC	GG	AA	AA	AA	GG	DD	AA	CC	AA	GG	AA	CC	AA	AA	GG
PI 507903	Rf1	13	Hungary	GG	AA	AA	AA	CC	GG	AA	AA	CC	GG	AA	AA	AA	GG	DD	AA	CC	AA	GG	AA	CC	AA	AA	GG
PI 531343	Rf1	13	Hungary	GG	AA	AA	AA	CC	GG	AA	AA	CC	GG	AA	AA	AA	GG	DD	AA	CC	AA	GG	AA	CC	AA	AA	GG
PI 531361	Rf1	13	Hungary	GG	AA	AA	AA	CC	GG	AA	AA	CC	GG	AA	AA	AA	GG	DD	AA	CC	AA	GG	AA	CC	AA	AA	GG
PI 531374	Rf1	13	Former Serbia and Montenegro	GG	AA	AA	AA	CC	GG	AA	AA	CC	GG	AA	AA	AA	GG	DD	AA	CC	AA	GG	AA	CC	AA	AA	GG
PI 531386	Rf1	13	Romania	GG	AA	AA	AA	CC	GG	AA	AA	CC	GG	AA	AA	AA	GG	DD	AA	CC	AA	GG	AA	CC	AA	AA	GG
PI 531392	Rf1	13	Poland	GG	AA	AA	AA	CC	GG	AA	AA	CC	GG	AA	AA	AA	GG	DD	AA	CC	AA	GG	AA	CC	AA	AA	GG
PI 531503	Rf1	13	United States	GG	AA	AA	AA	CC	GG	AA	AA	CC	GG	AA	AA	AA	GG	DD	AA	CC	AA	GG	AA	CC	AA	AA	GG
PI 536626	Rf1	13	Spain	GG	AA	AA	AA	CC	GG	AA	AA	CC	GG	AA	AA	AA	GG	DD	AA	CC	AA	GG	AA	CC	AA	AA	GG
PI 536627	Rf1	13	Spain	GG	AA	AA	AA	CC	GG	AA	AA	CC	GG	AA	AA	AA	GG	DD	AA	CC	AA	GG	AA	CC	AA	AA	GG
PI 552951	Rf1	13	Canada, Manitoba	GG	AA	AA	AA	CC	GG	AA	AA	CC	GG	AA	AA	AA	GG	DD	AA	CC	AA	GG	AA	CC	AA	AA	GG
PI 600812	Rf1	13	United States	GG	AA	AA	AA	CC	GG	AA	AA	CC	GG	AA	AA	AA	GG	DD	AA	CC	AA	GG	AA	CC	AA	AA	GG
PI 650618	Rf1	13	Uncertain	GG	AA	AA	AA	CC	GG	AA	AA	CC	GG	AA	AA	AA	GG	DD	AA	CC	AA	GG	AA	CC	AA	AA	GG
PI 650676	Rf1	13	Spain	GG	AA	AA	AA	CC	GG	AA	AA	CC	GG	AA	AA	AA	GG	DD	AA	CC	AA	GG	AA	CC	AA	AA	GG
PI 650757	Rf1	13	Mexico	GG	AA	AA	AA	CC	GG	AA	AA	CC	--	AA	AA	AA	GG	DD	AA	CC	AA	GG	AA	CC	AA	AA	GG
PI 650758	Rf1	13	Mexico	GG	AA	AA	AA	CC	GG	AA	AA	CC	AG	AA	AA	AA	GG	DD	AA	CC	AA	GG	AA	CC	AA	AA	GG
PI 650760	Rf1	13	Mexico	GG	AA	AA	AA	CC	GG	AA	AG	AC	AG	AC	AA	AA	GG	DD	AA	CC	AG	GG	AA	CC	AA	AA	GG
PI 650787	Rf1	13	Russian Federation	GG	AA	AA	AA	CC	GG	AA	--	CC	GG	AA	AA	AA	GG	DD	AA	CC	AA	GG	AA	CC	AA	AA	GG
PI 650820	Rf1	13	Argentina	GG	--	AA	AA	CC	GG	AA	AA	CC	GG	AA	AA	AA	GG	DD	AA	CC	AA	GG	AA	CC	AA	AA	GG
PI 650824	Rf1	13	Argentina	GG	AA	AA	AA	CC	GG	AA	AA	CC	GG	AA	AA	AA	GG	DD	AA	CC	AA	GG	AA	CC	AA	AA	GG
RHA 280	Rf3	7	Sundak Sel	AA	CC	GG	GG	AA	AA	GG	GG	AA	AA	CC	--	GG	AA	DD	CC	AA	GG	AA	AA	--	CC	GG	AA
RHA 340	Rf3	7	HA 89*3/H. argophyllus 415	AA	CC	GG	GG	AA	GG	GG	GG	AA	AA	CC	AA	--	AA	--	CC	AA	GG	AA	--	CC	CC	GG	AA
Rf ANN-1742a	Rf5	13	cms HA 89*2 /ANN-1742 (PI 613748)	AA	CC	GG	AG	AC	AG	GG	--	AC	AA	CC	AG	GG	AA	--	CC	AC	GG	AA	AC	--	CC	GG	AA
HA-R9	Rf5	13	Rf ANN-1742 selection	AA	CC	GG	GG	CC	GG	GG	GG	AA	AA	CC	AA	GG	AA	II	CC	CC	GG	AA	AA	AA	CC	GG	AA
RHA 428	Rf7	13	RHA 801//RHA 365/PI 413157	AA	CC	GG	AA	CC	GG	GG	GG	AA	--	CC	AA	GG	AA	DD	CC	AA	GG	AA	AA	CC	CC	GG	AA
RHA 265			2*Peredovik/953-102-1-1-41 = T66006-2-1-3-1	AA	AA	AA	--	CC	AA	AA	AA	CC	GG	AA	GG	AA	AA	DD	AA	CC	AA	AA	AA	CC	AA	AA	GG
RHA 295			Selected from multiple crosses involving cmsPI 343763	GG	CC	AA	AA	CC	GG	AA	GG	AA	AA	CC	AA	AA	GG	DD	AA	CC	GG	GG	AA	CC	AA	AA	GG
RHA 364			F6 derived restorer line selected from Romanian hybrid Felix	AA	--	GG	GG	--	AA	GG	--	--	--	CC	--	GG	AA	II	CC	CC	GG	AA	CC	AA	CC	GG	AG
RHA 365			SELECT	AA	AA	AA	GG	CC	AA	AA	AA	CC	GG	AA	--	AA	AA	DD	AA	CC	AA	AA	AA	CC	CC	AA	GG
RHA 366			RF-8784/RHA 274	AA	CC	GG	GG	CC	GG	GG	--	AA	--	CC	AA	GG	AA	DD	CC	AA	GG	AA	CC	--	CC	AA	AA
RHA 368			NS-H-27/RHA 274	AA	AA	AA	GG	CC	AA	AA	AA	CC	GG	AA	--	AA	AA	DD	AA	CC	AA	AA	AA	AA	CC	AA	GG
RHA 392			SELECT	AA	AA	AA	GG	CC	AA	AA	AA	CC	GG	AA	--	AA	AA	DD	AA	CC	AA	AA	AA	CC	CC	AA	GG
RHA 397			RHA 274/RO-20-10-3-3-2	AA	CC	GG	AA	--	GG	GG	--	--	--	CC	GG	--	AA	DD	CC	AA	GG	AA	CC	--	CC	GG	AA
RHA 398			RHA 274/BCD Line Bulk	AA	CC	GG	GG	--	AA	GG	--	AA	AA	CC	--	GG	AA	DD	CC	--	GG	AA	AA	--	CC	GG	AA
RHA 426			RHA 409 / RHA 376*2 / H. annuus IMI resistant	AA	AA	GG	GG	CC	GG	GG	AA	CC	GG	AA	AA	AA	AA	--	CC	CC	AA	GG	CC	CC	CC	AA	AA
RHA 436			RHA 340/RHA 344	AA	CC	GG	GG	AA	GG	GG	GG	AA	AA	CC	AA	--	AA	--	CC	AA	GG	AA	--	CC	CC	GG	AA
RHA 437			RHA 340/RHA 344	AA	--	GG	GG	--	GG	GG	GG	--	--	CC	AA	--	--	--	CC	AA	GG	AA	--	CC	--	GG	AA
RHA 438			RHA 340/RHA 344	AA	CC	GG	GG	AA	GG	GG	GG	AA	AA	CC	AA	--	AA	--	CC	AA	GG	AA	--	CC	CC	GG	AA
RHA 443			RHA 426/RHA 419//RHA 377/AS 4379	AA	AA	AA	GG	CC	AA	AA	GG	CC	GG	AA	--	AA	AA	DD	AA	CC	AA	AA	AA	CC	CC	AA	GG
RHA 447			RHA377/RHA348 High Oleic	AA	AA	AA	GG	CC	AA	AA	GG	CC	GG	AA	--	AA	AA	DD	AA	CC	AA	AA	AA	CC	CC	AA	GG
RHA 454			RHA 447//RHA440/PSC 8	AA	AA	AA	GG	CC	AA	AA	GG	CC	GG	AA	--	AA	AA	DD	AA	CC	AA	AA	AA	--	CC	AA	GG
RHA 855			CMS HA 89/RHA 273	AA	AA	AA	--	CC	AA	AA	GG	CC	GG	AA	GG	AA	AA	DD	AA	CC	AA	AA	AA	CC	CC	AA	GG
RHA 856			RHA 299/Sorem HT 58	AA	AA	AA	--	CC	AA	AA	GG	CC	GG	AA	GG	AA	AA	DD	AA	CC	AA	AA	AA	CC	CC	AA	GG
RMAX1			cmsHA 89(MAX1)//RCMG3/*3 RHA 274/3/cmsHA 89(MAX1)/RCMG3	AA	AA	AA	--	CC	AA	AA	GG	CC	GG	AA	--	AA	AA	DD	AA	CC	AA	AA	AA	CC	CC	AA	GG
PAR-1673-2			cmsHA 89*3/H. paradoxus (ACC 1673) F4 Sibbed one generation, selfed two generations	AA	AC	GG	GG	AC	AG	GG	GG	--	AA	CC	GG	--	AA	--	CC	AC	GG	AA	AC	--	CC	GG	AA
Rf ARG-420			cms HA 89*2 (Helianthus annuus)/ARG-420 (H. argophyllus) F2	AA	CC	GG	GG	AA	AA	GG	GG	AA	AA	CC	GG	--	AA	II	CC	AA	GG	AA	CC	AA	CC	GG	AA
†Maintainer line
£Sunflower line not known to restore fertility
a heterozygous for Rf5
